# Supplementary material for: Transcultural adaptation and psychometric validation of a Spanish-language version of the “Pelvic Girdle Questionnaire”
Source: Springer Nature journal article supplement (doi:10.1186/s12955-017-0605-0), 2017-01-01
Supplement: MOESM1 [file 12035534]

## APPENDIX

### Cuestionario de la cintura pélvica

Nombre: \_\_\_\_\_ Fecha: \_\_\_\_\_

¿En qué medida su dolor a nivel de la pelvis dificulta la realización de las actividades citadas a continuación? Para cada actividad, marque la casilla que mejor describa cómo se siente hoy.

| Indique en qué medida le afecta el dolor de la pelvis a la hora de realizar las siguientes actividades: | Nada (0) | Levemente(1) | Bastante(2) | Mucho (3) |
|---------------------------------------------------------------------------------------------------------|----------|--------------|-------------|-----------|
| 1. Vestirse                                                                                             |          |              |             |           |
| 2. Permanecer de pie más de 10 minutos                                                                  |          |              |             |           |
| 3. Permanecer de pie más de 60 minutos                                                                  |          |              |             |           |
| 4. Agacharse                                                                                            |          |              |             |           |
| 5. Estar sentado menos de 10 minutos                                                                    |          |              |             |           |
| 6. Estar sentado más de 60 minutos                                                                      |          |              |             |           |
| 7. Caminar menos de 10 minutos                                                                          |          |              |             |           |
| 8. Caminar más de 60 minutos                                                                            |          |              |             |           |
| 9. Subir las escaleras                                                                                  |          |              |             |           |
| 10. Realizar tareas domésticas                                                                          |          |              |             |           |
| 11. Cargar objetos ligeros                                                                              |          |              |             |           |
| 12. Cargar objetos pesados                                                                              |          |              |             |           |
| 13. Levantarse/ sentarse                                                                                |          |              |             |           |
| 14. Empujar un carrito de la compra                                                                     |          |              |             |           |
| 15. Correr                                                                                              |          |              |             |           |
| 16. Llevar a cabo actividades deportivas*                                                               |          |              |             |           |
| 17. Tumbarse                                                                                            |          |              |             |           |
| 18. Darse la vuelta en la cama                                                                          |          |              |             |           |
| 19. Llevar una vida sexual normal *                                                                     |          |              |             |           |
| 20. Empujar algo con el pie                                                                             |          |              |             |           |

\* Si alguna de estas actividades no procede por favor, marque la casilla de la derecha

| Cuánto dolor siente : | Nada (0) | Un poco (1) | Bastante (2) | Mucho (3) |
|-----------------------|----------|-------------|--------------|-----------|
| 21. Por la mañana     |          |             |              |           |
| 22. Por la noche      |          |             |              |           |

| En qué medida el dolor de la pelvis hace que: | Nada (0) | Levemente (1) | Bastante (3) | Mucho (3) |
|-----------------------------------------------|----------|---------------|--------------|-----------|
| 23. Su pierna/ sus piernas ceda(n)            |          |               |              |           |
| 24. Haga las cosas más lentamente             |          |               |              |           |
| 25. Su sueño se vea interrumpido              |          |               |              |           |
